# Supplementary material for: GALNT14-mediated O-glycosylation on PHB2 serine-161 enhances cell growth, migration and drug resistance by activating IGF1R cascade in hepatoma cells
Source: PubMed Central journal article supplement (PMC9663550; doi:10.1038/s41419-022-05419-y), 2022-11-14

### Original western blots for Fig 1C

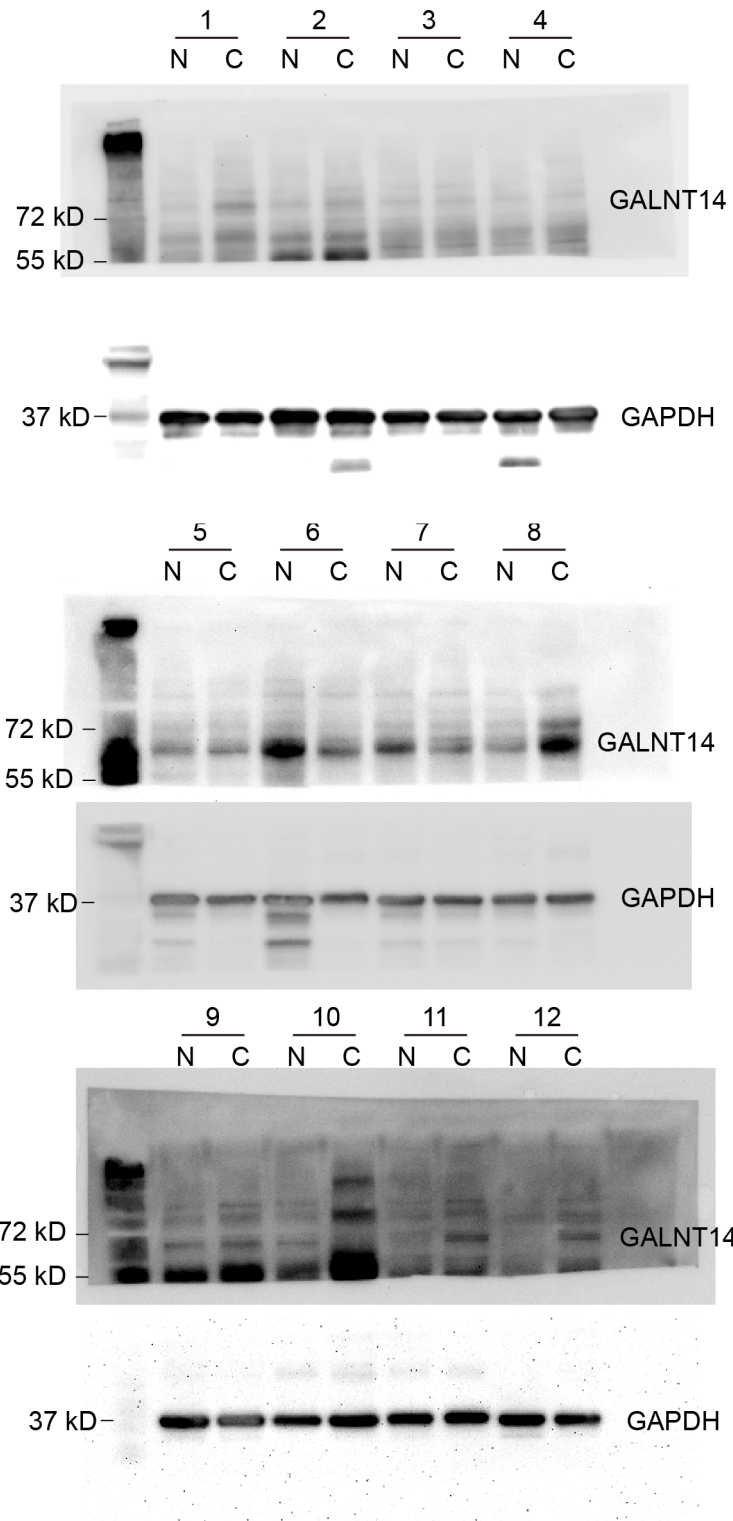

### Original western blots for Fig 2A

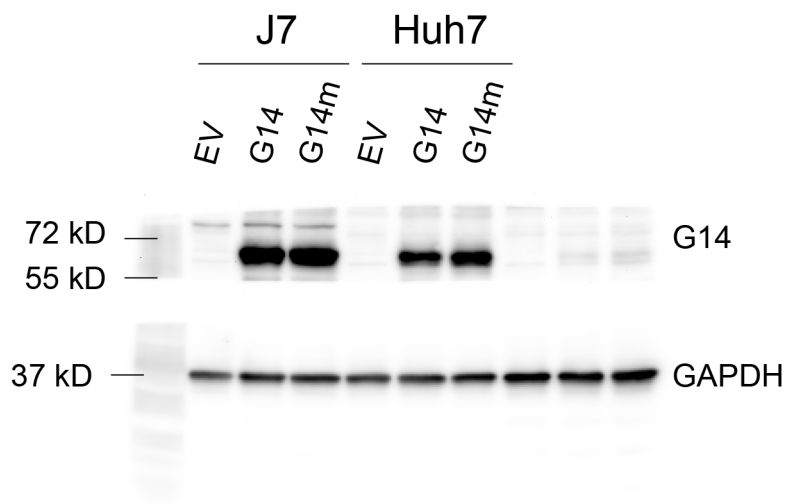

### Original western blots for Fig 2C

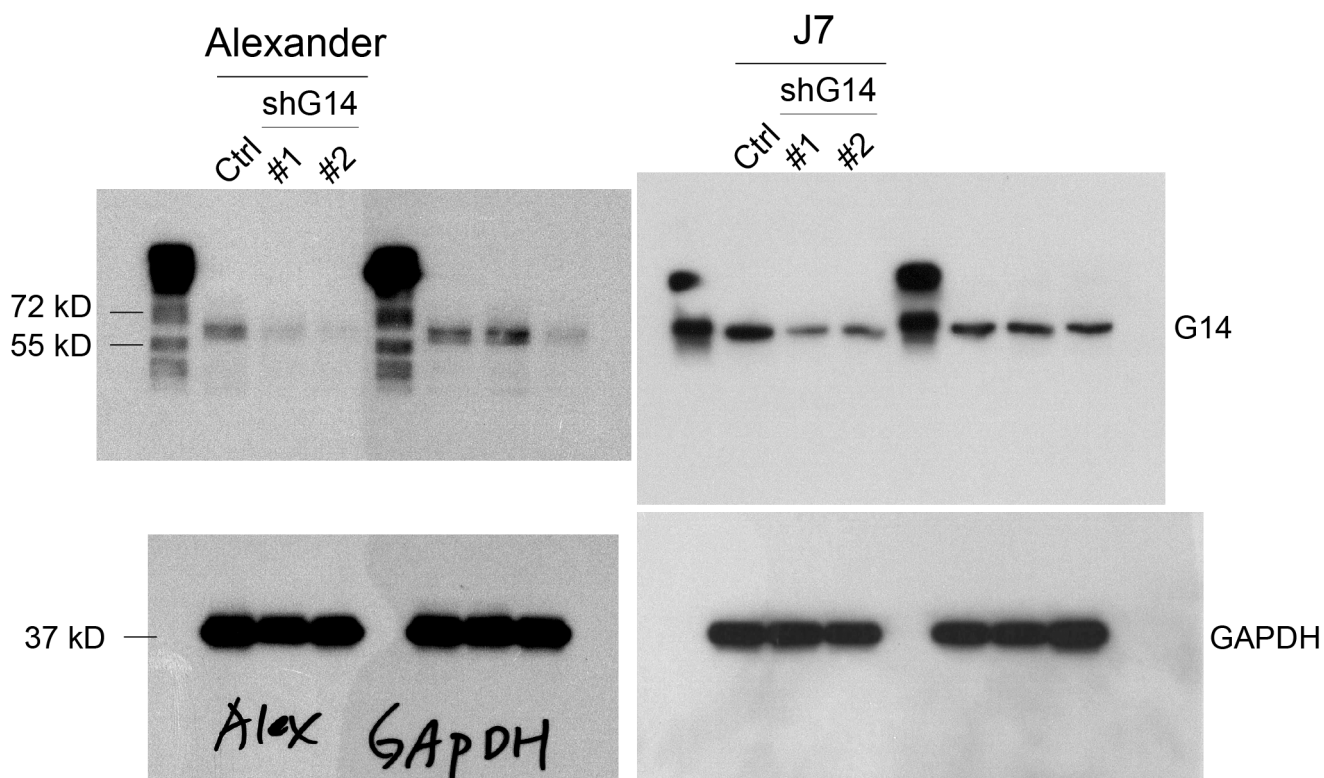

### Original western blots for Fig 3B

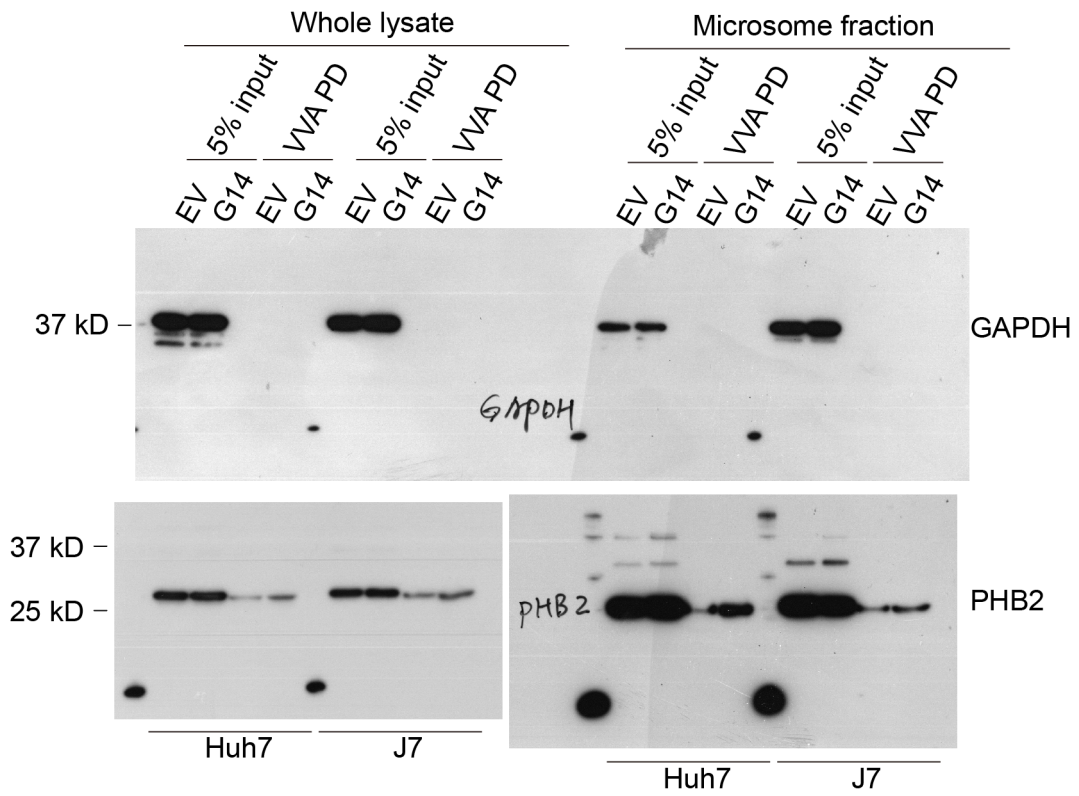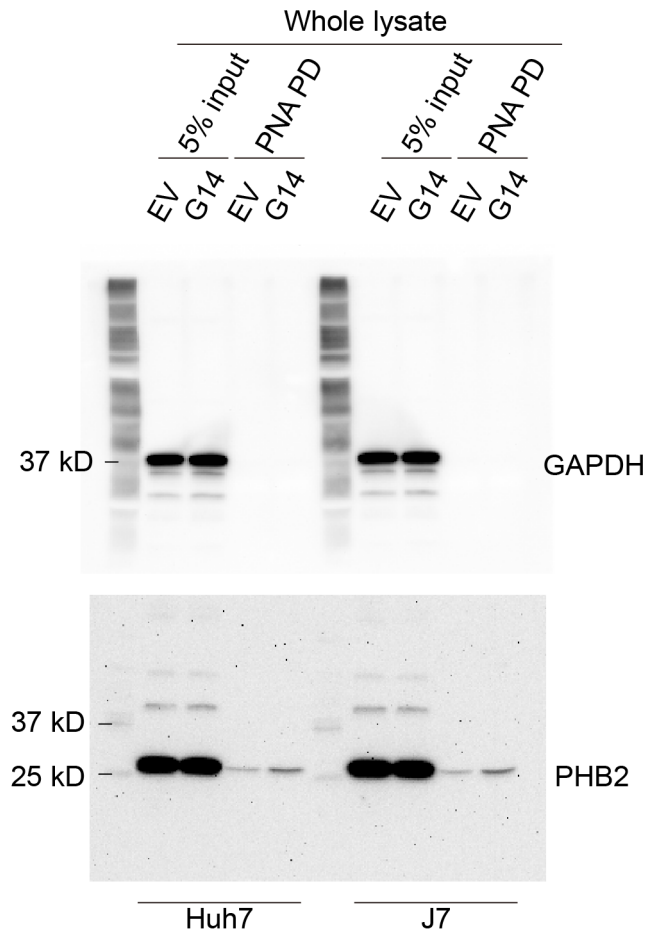

### Original western blots for Fig 3C

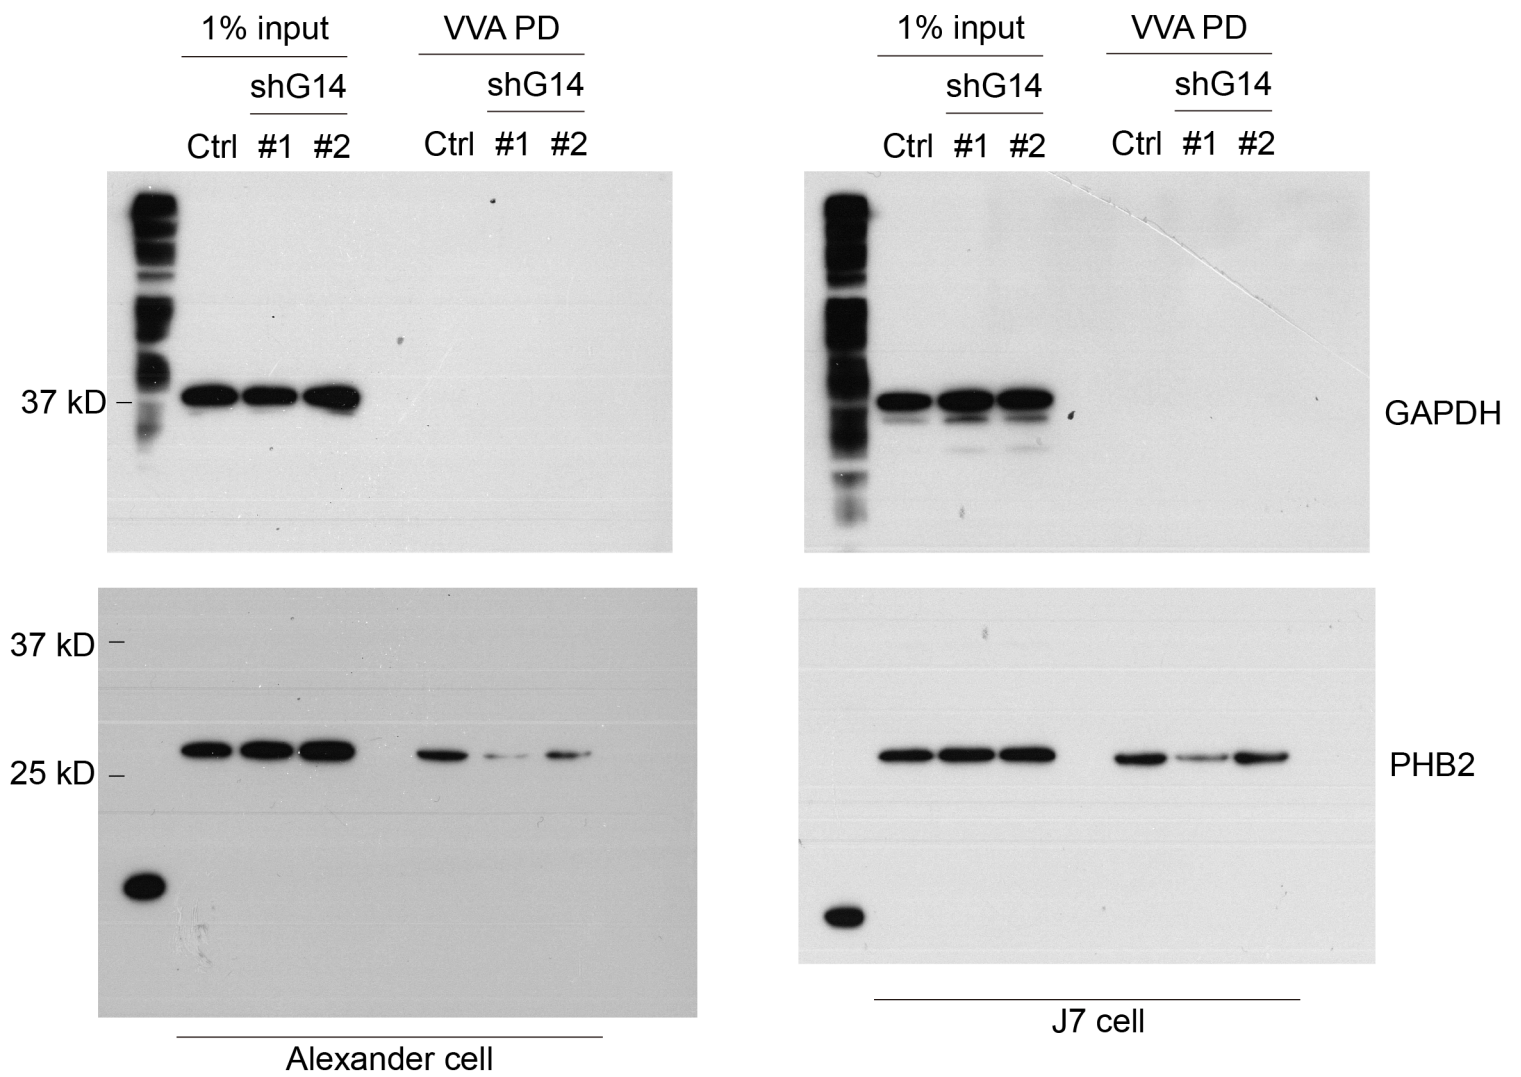



# Original western blots for Fig 3D

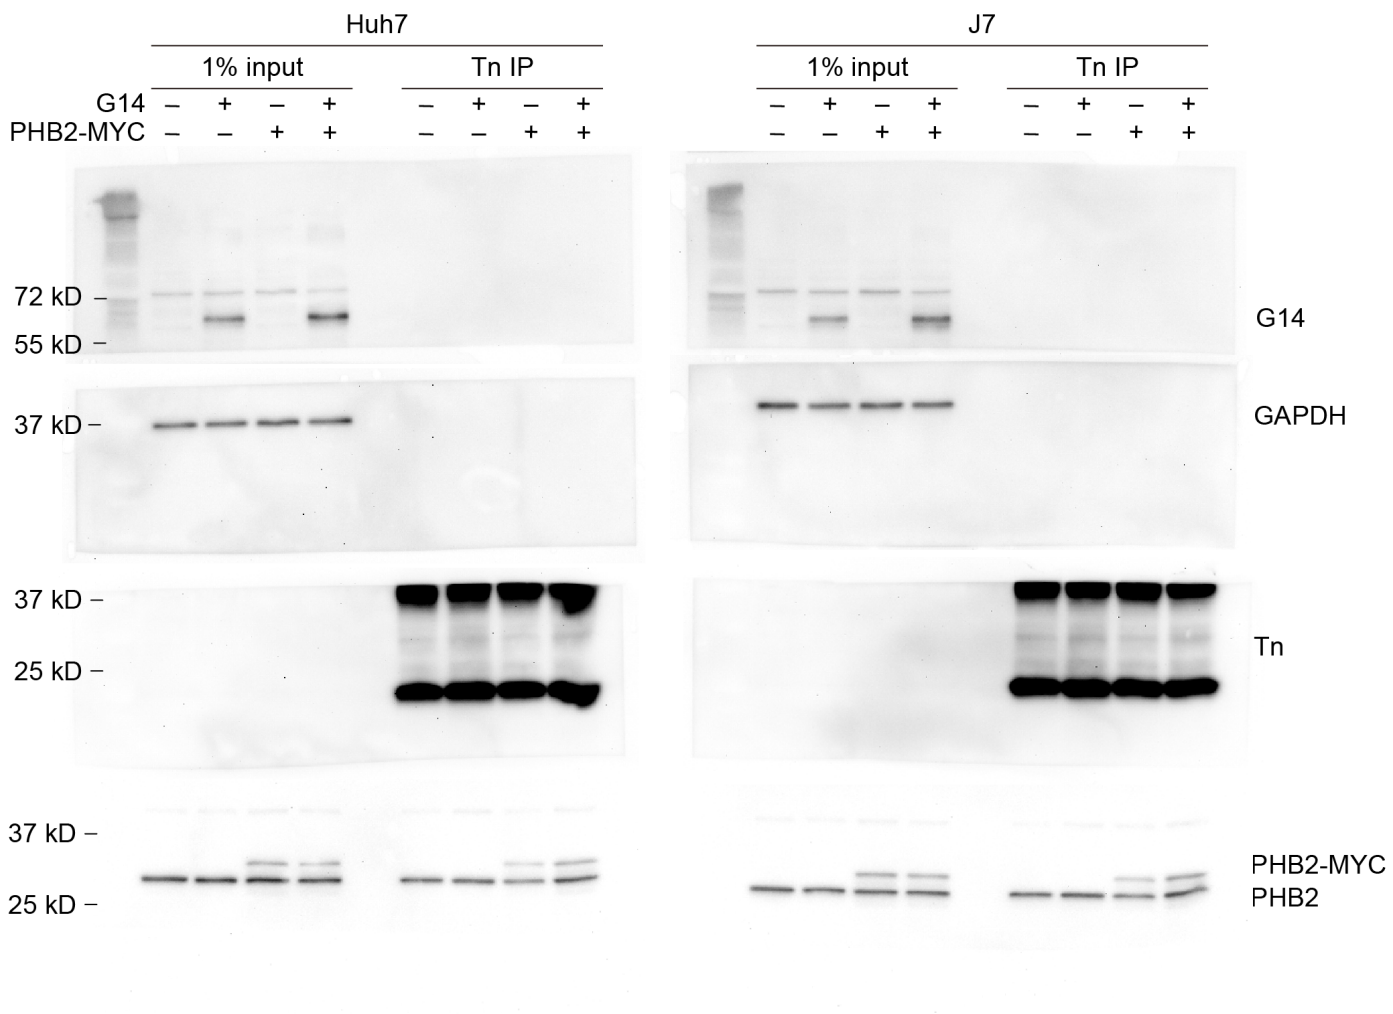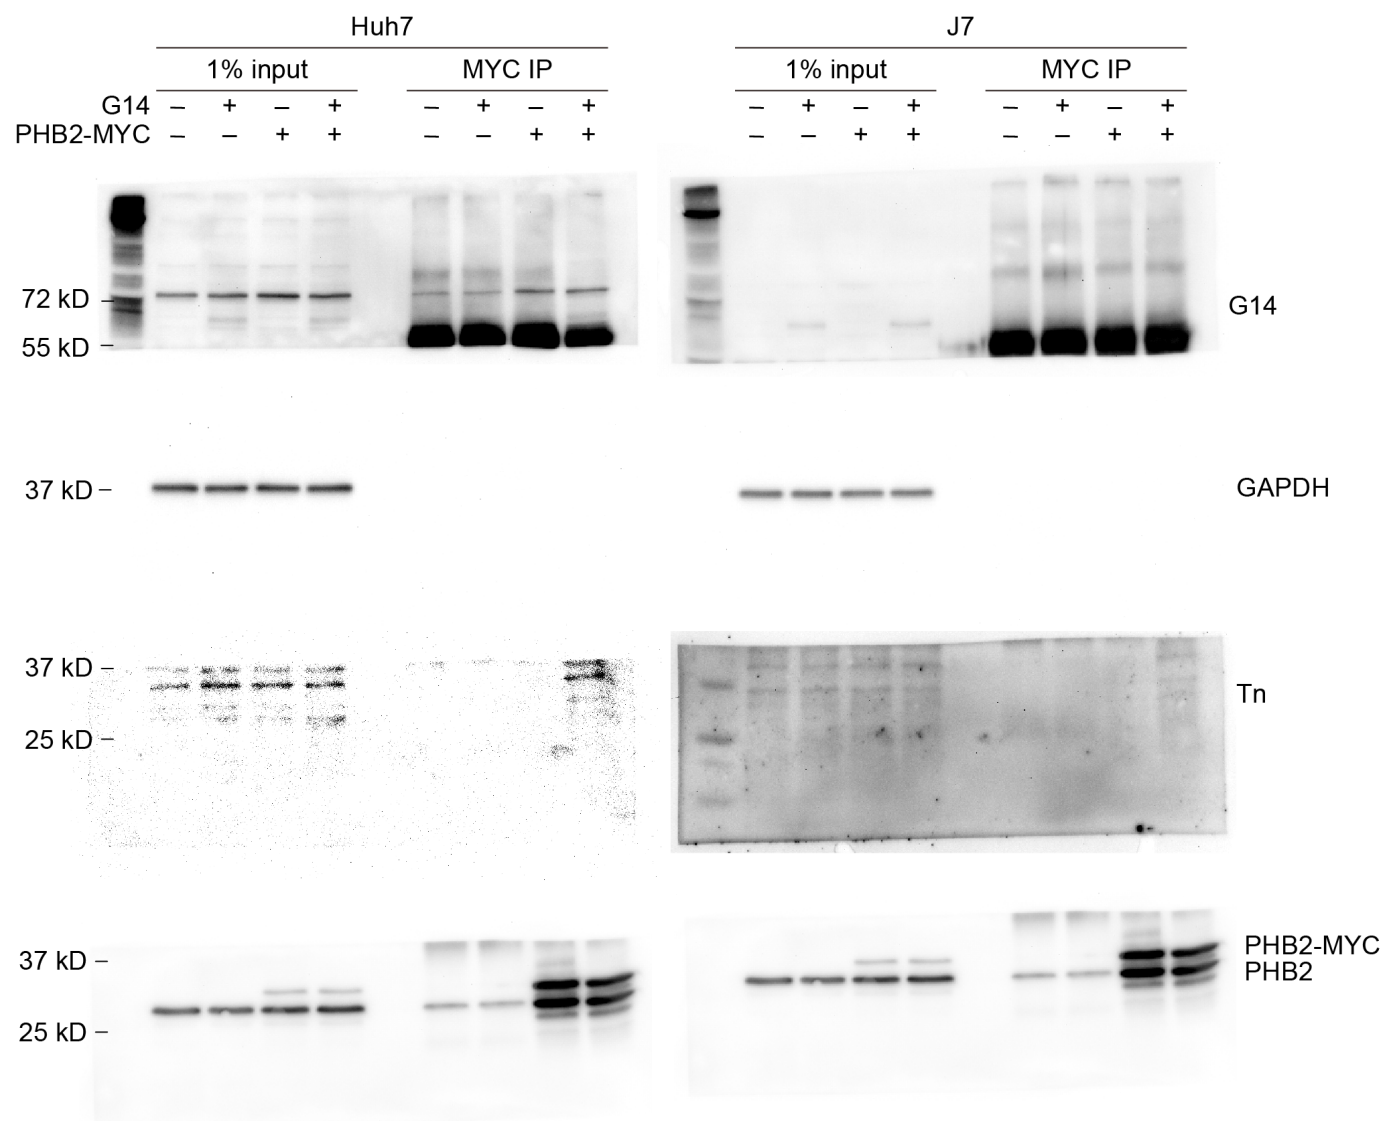

### Original western blots for Fig 3E

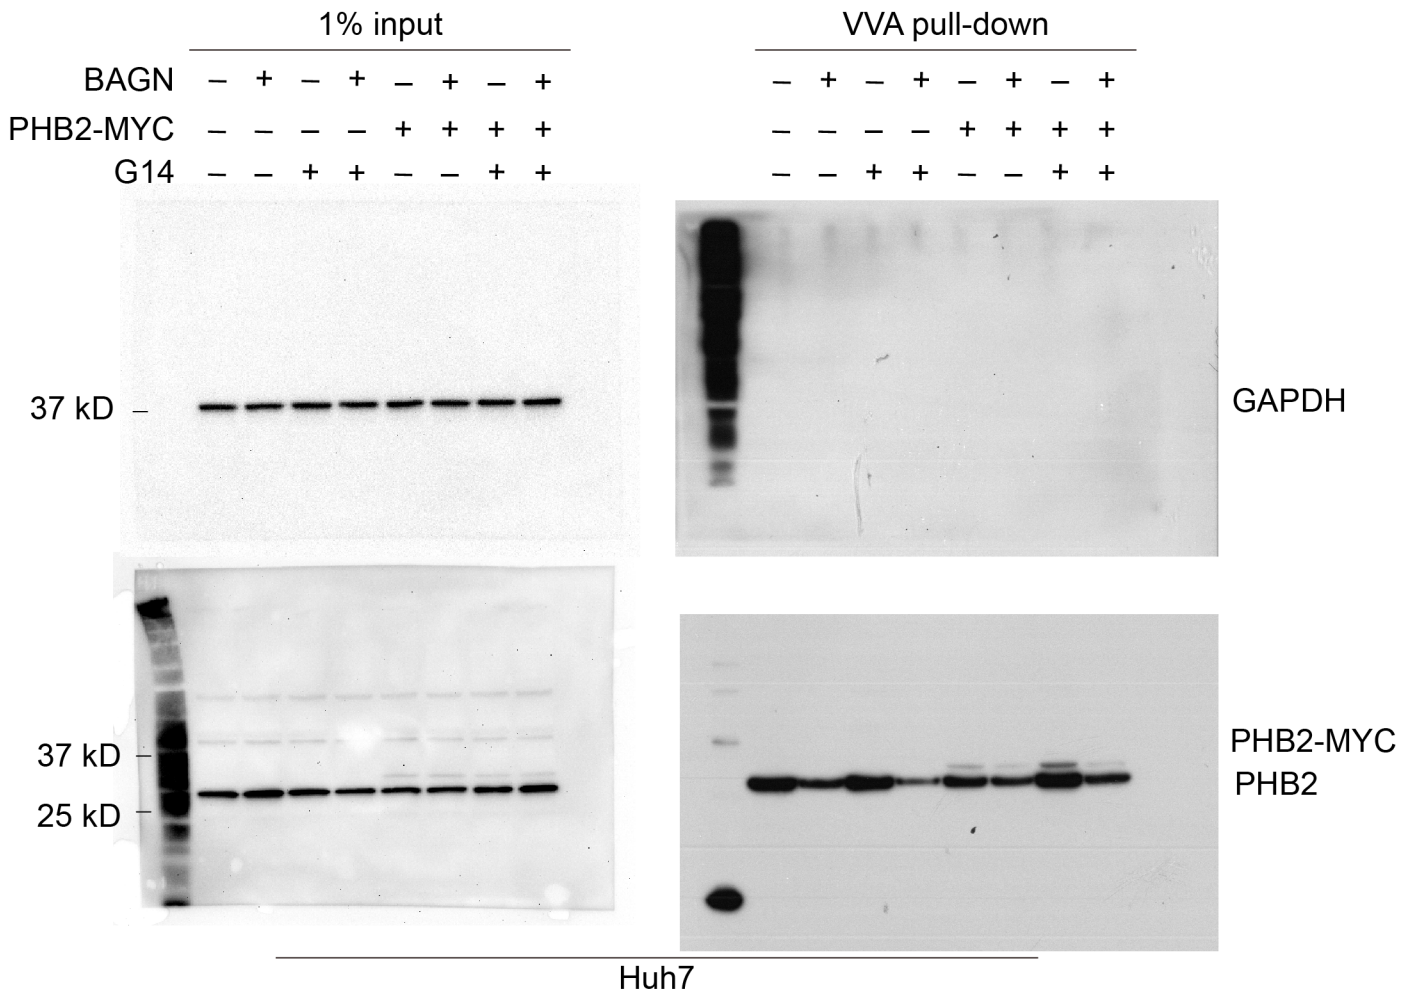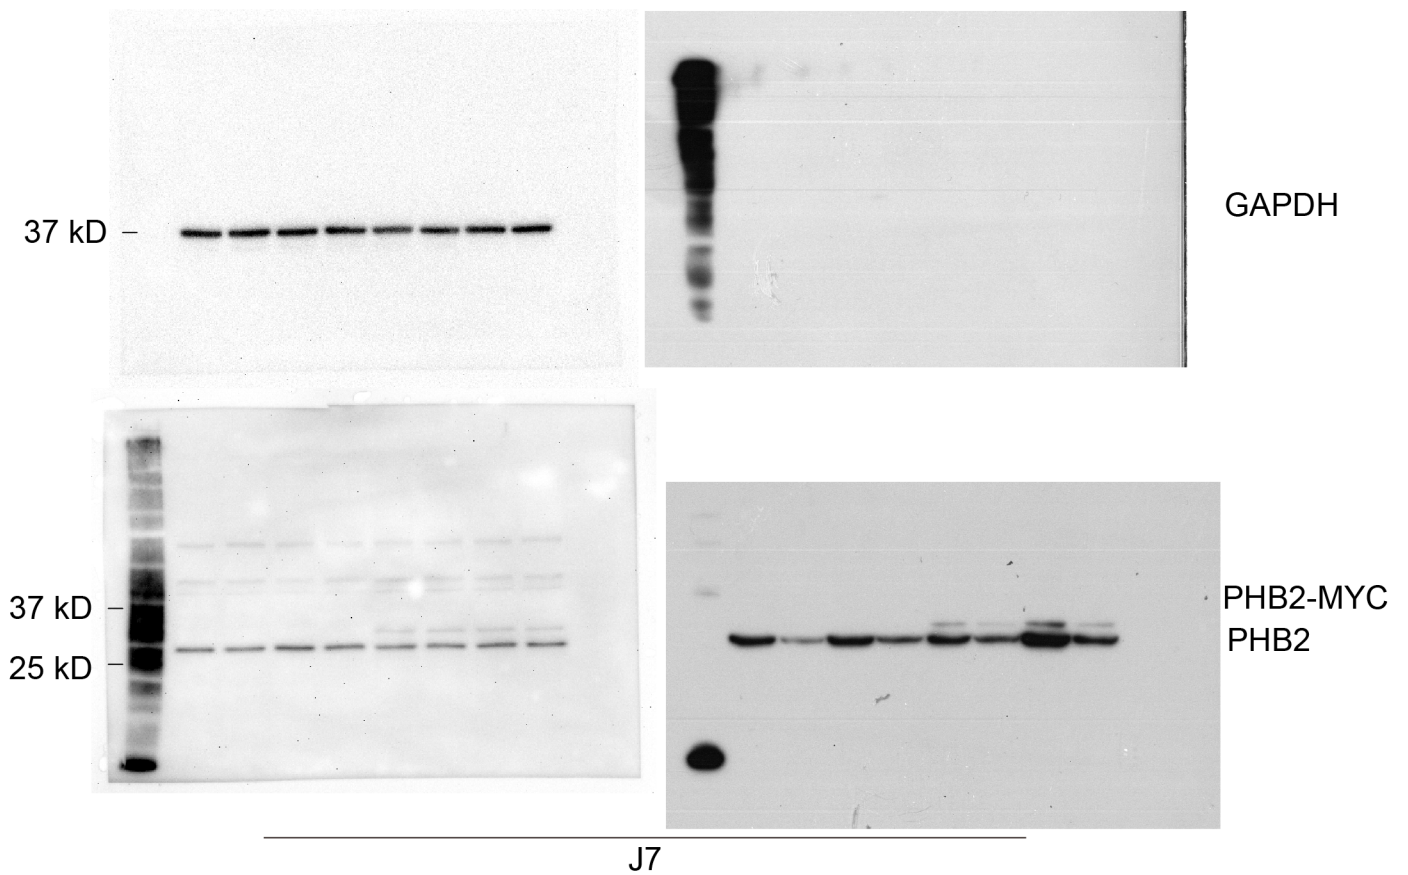





# Original western blots for Fig 4B

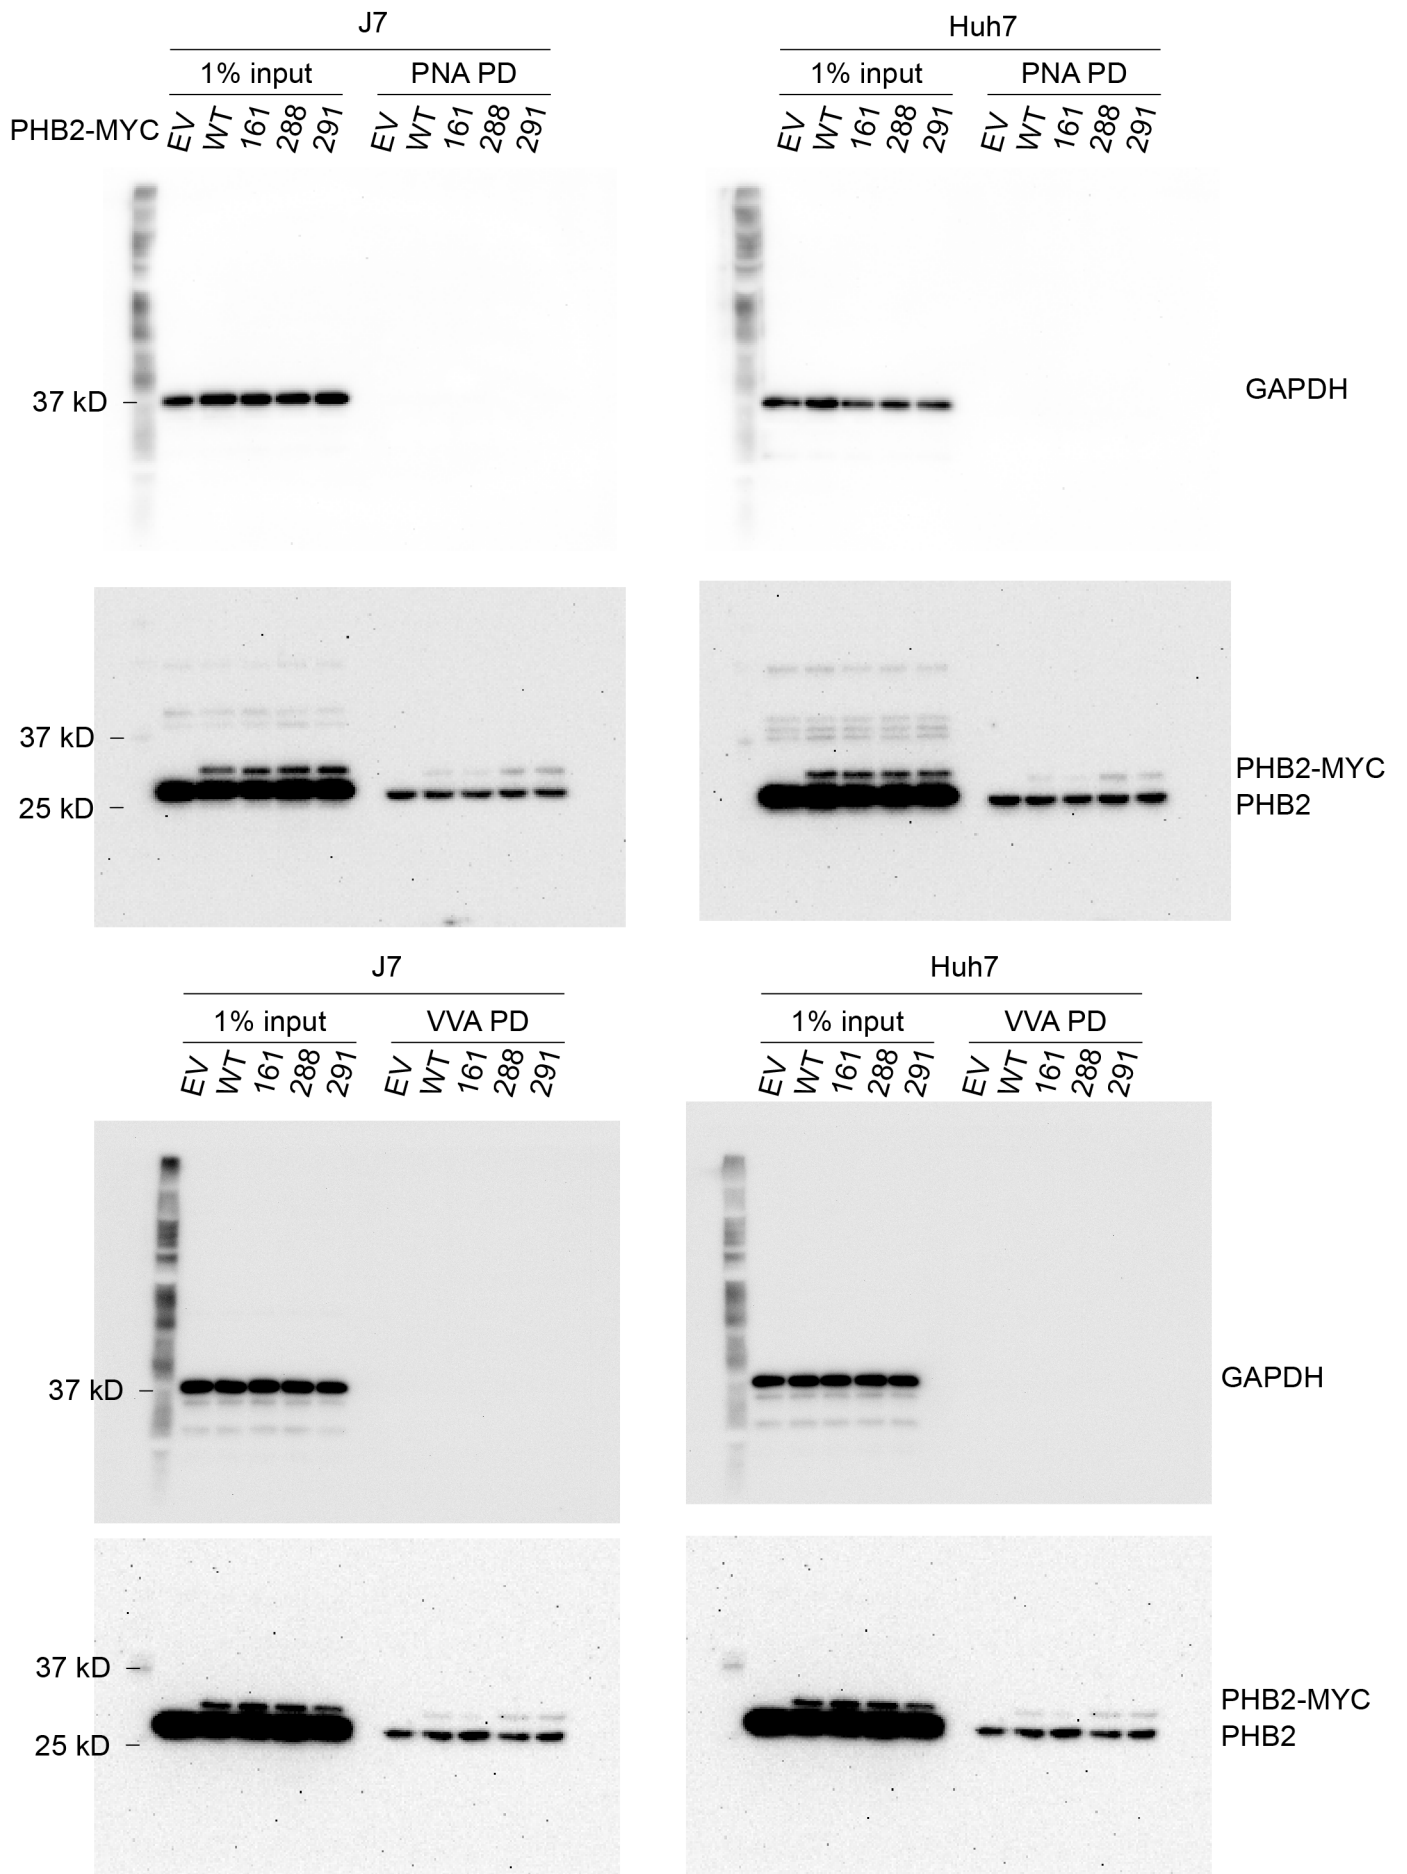

# Original western blots for Fig 4D

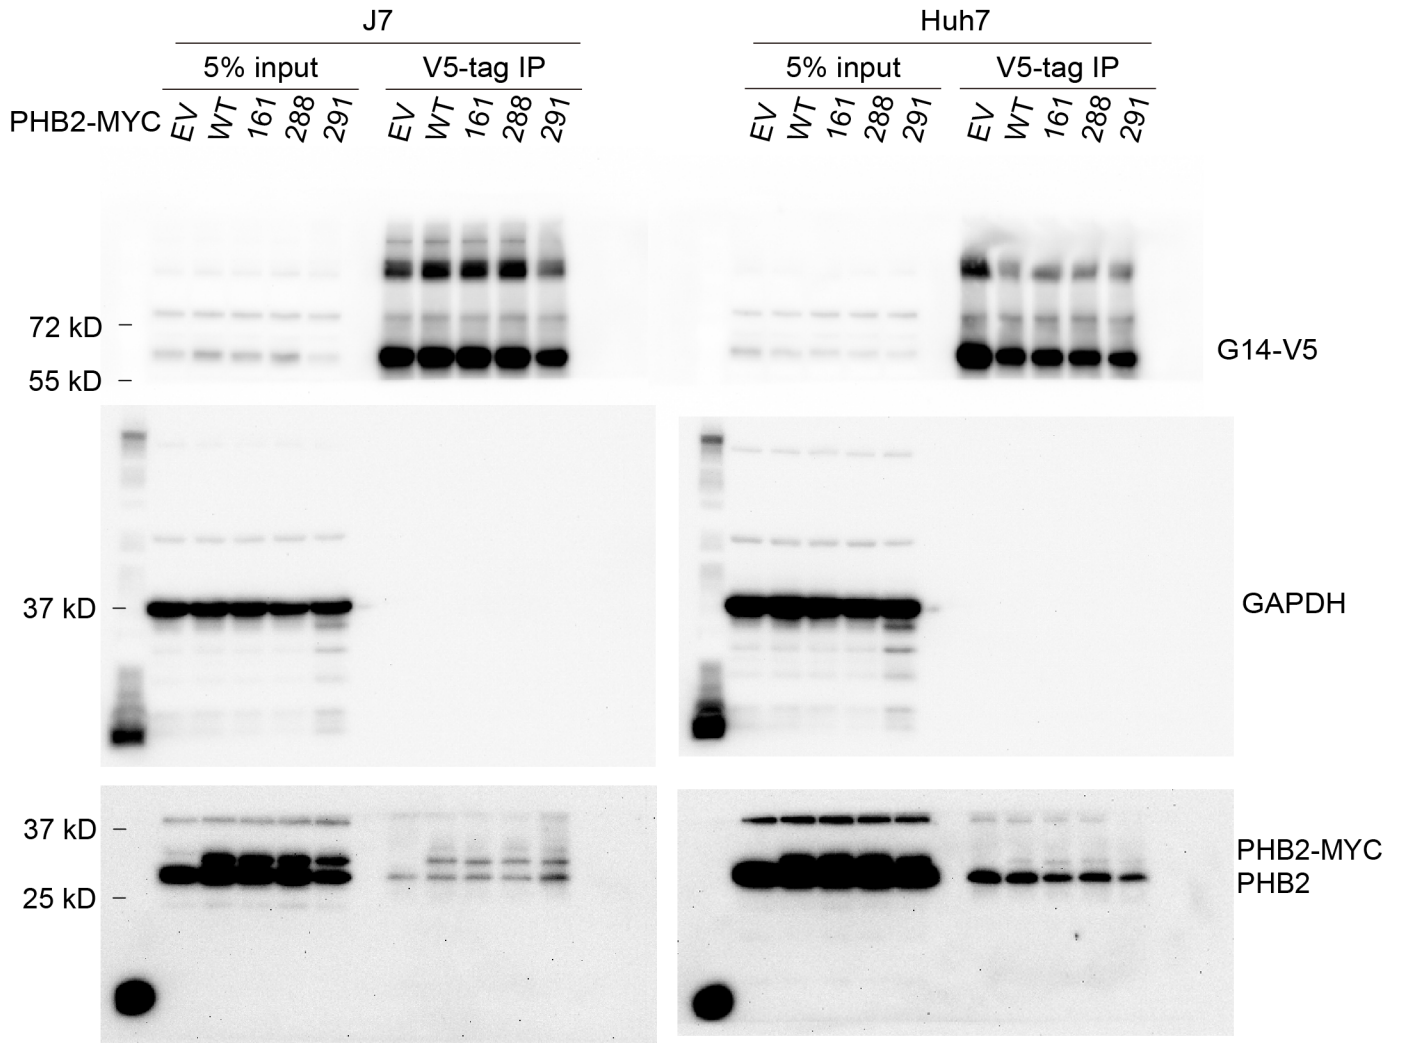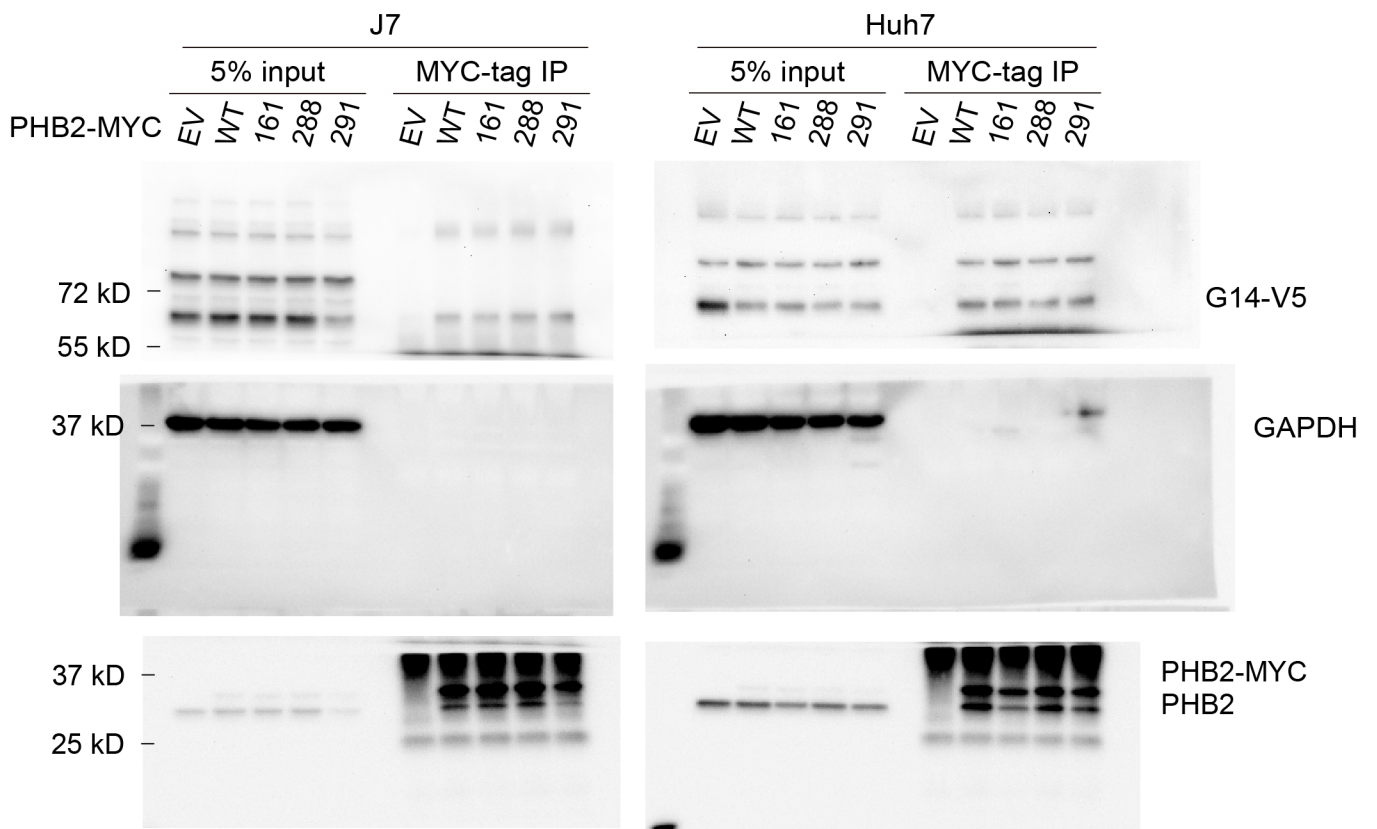





### Original western blots for Fig 5A

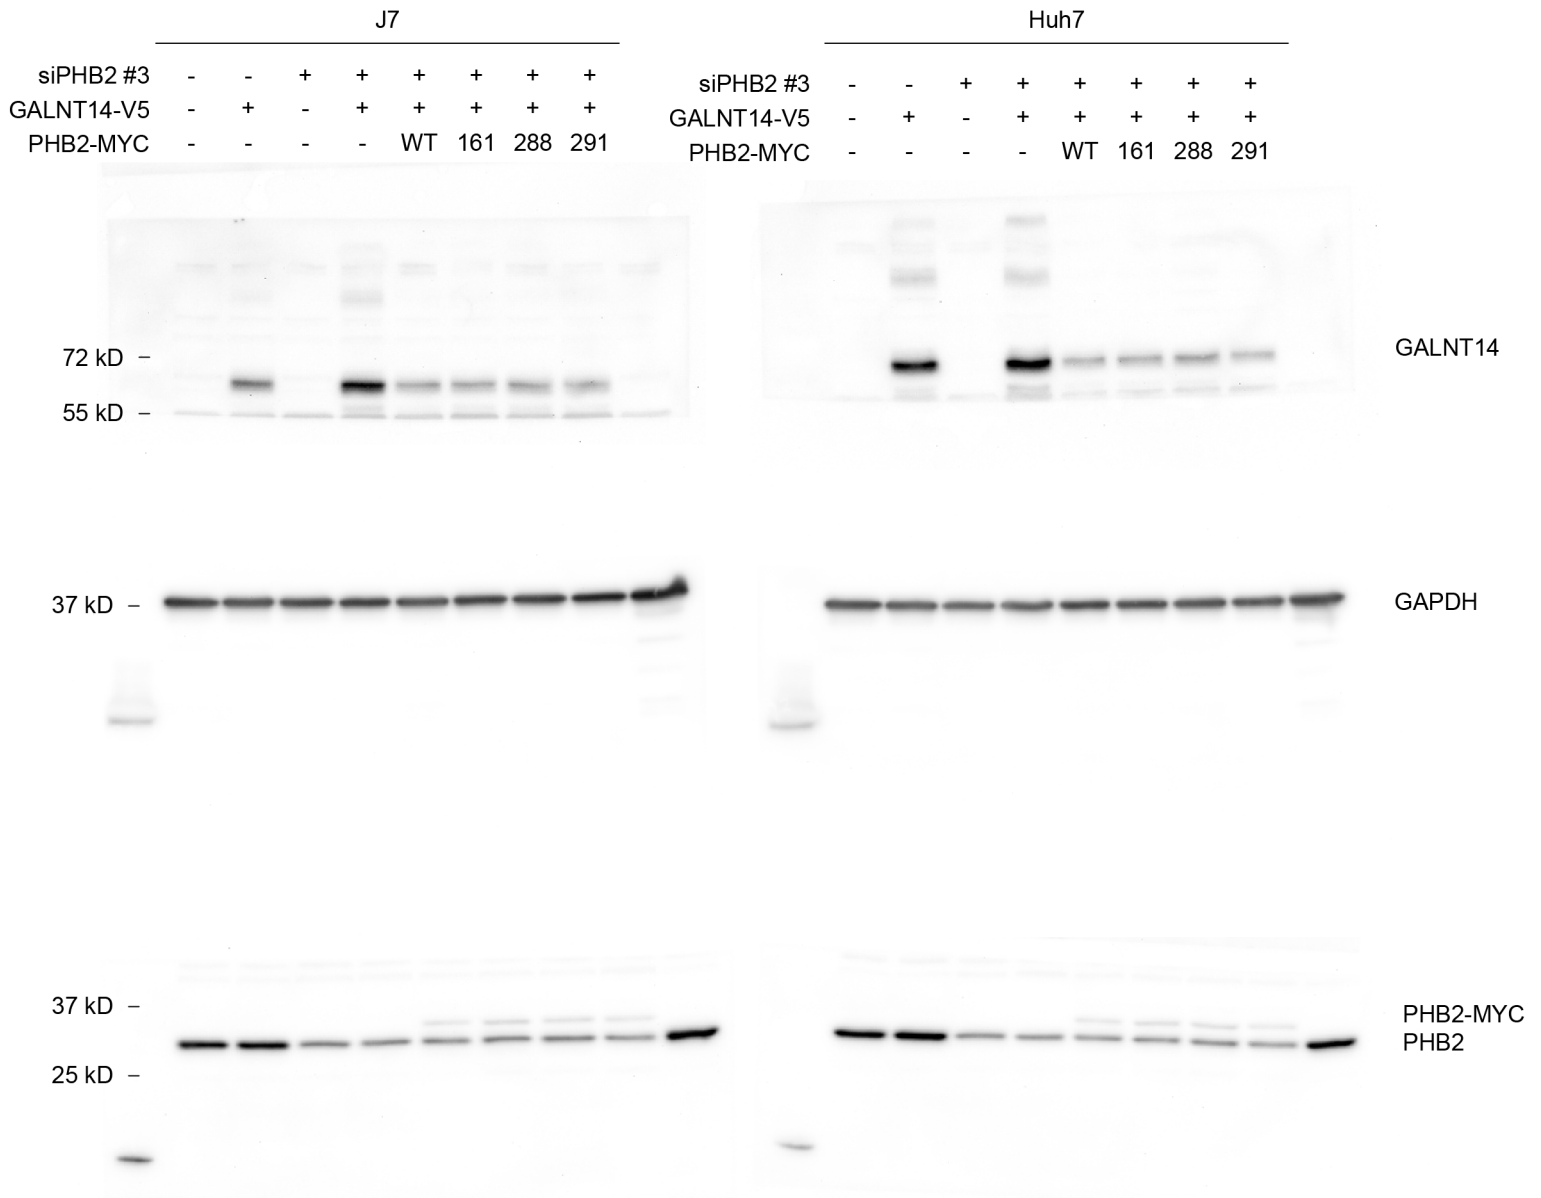

Original western blots for Fig 6A

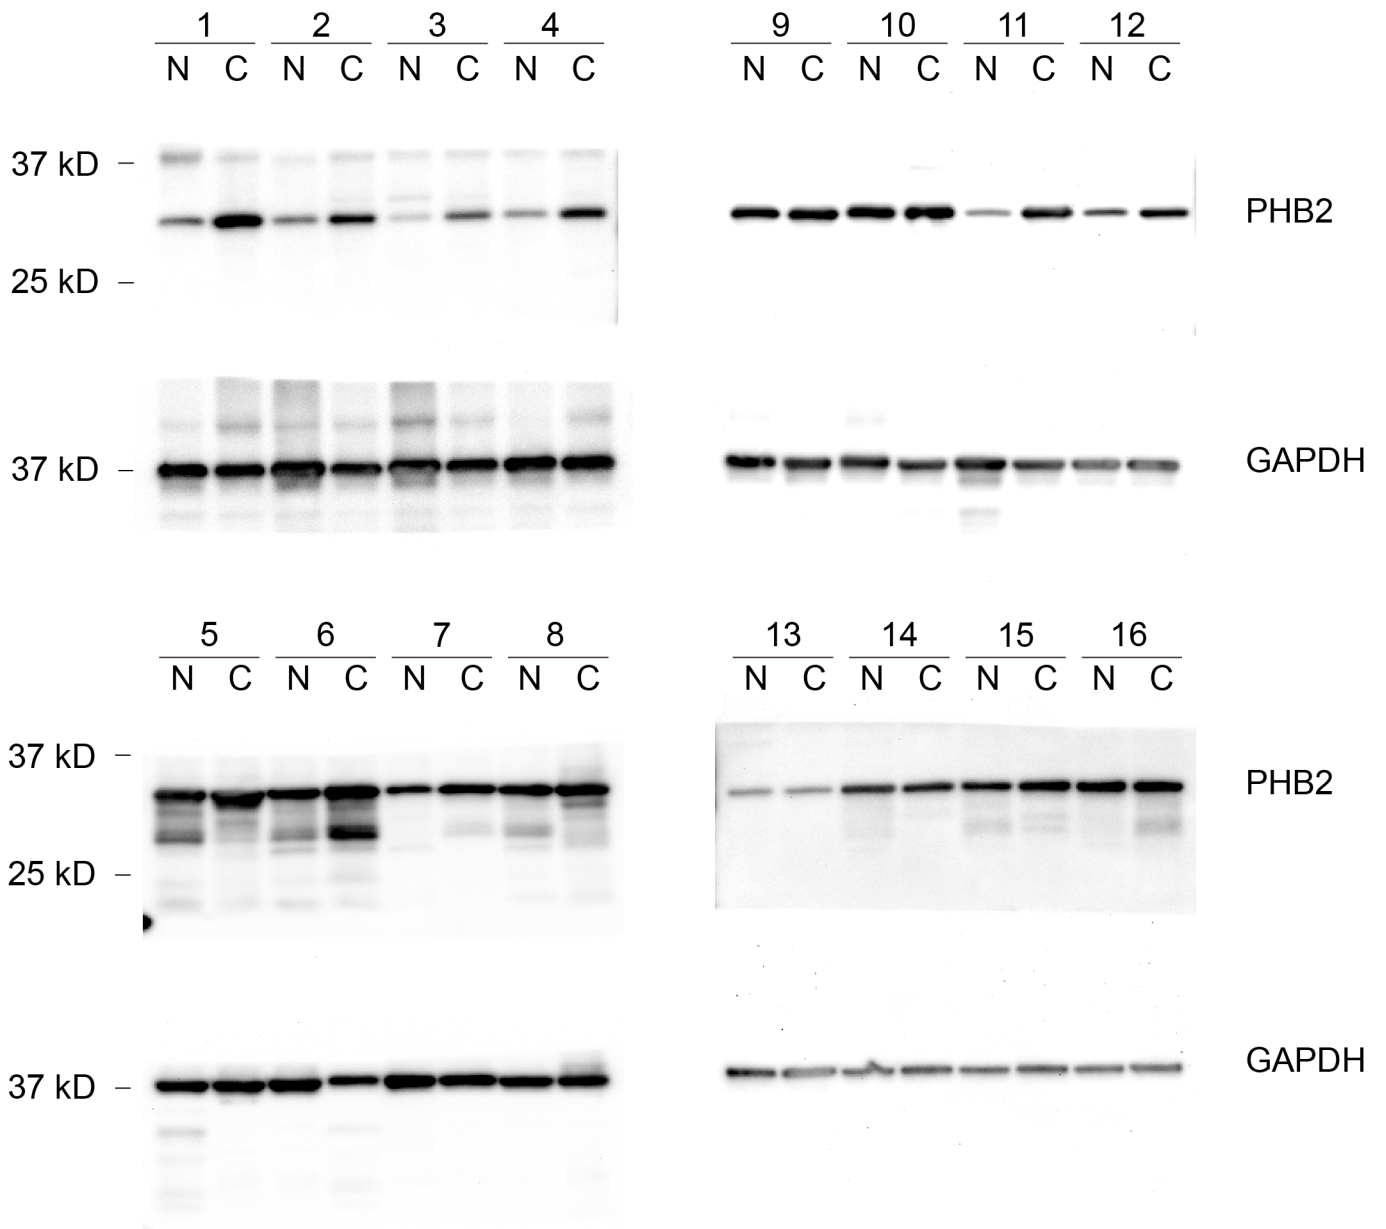

### Original western blots for Fig 6E

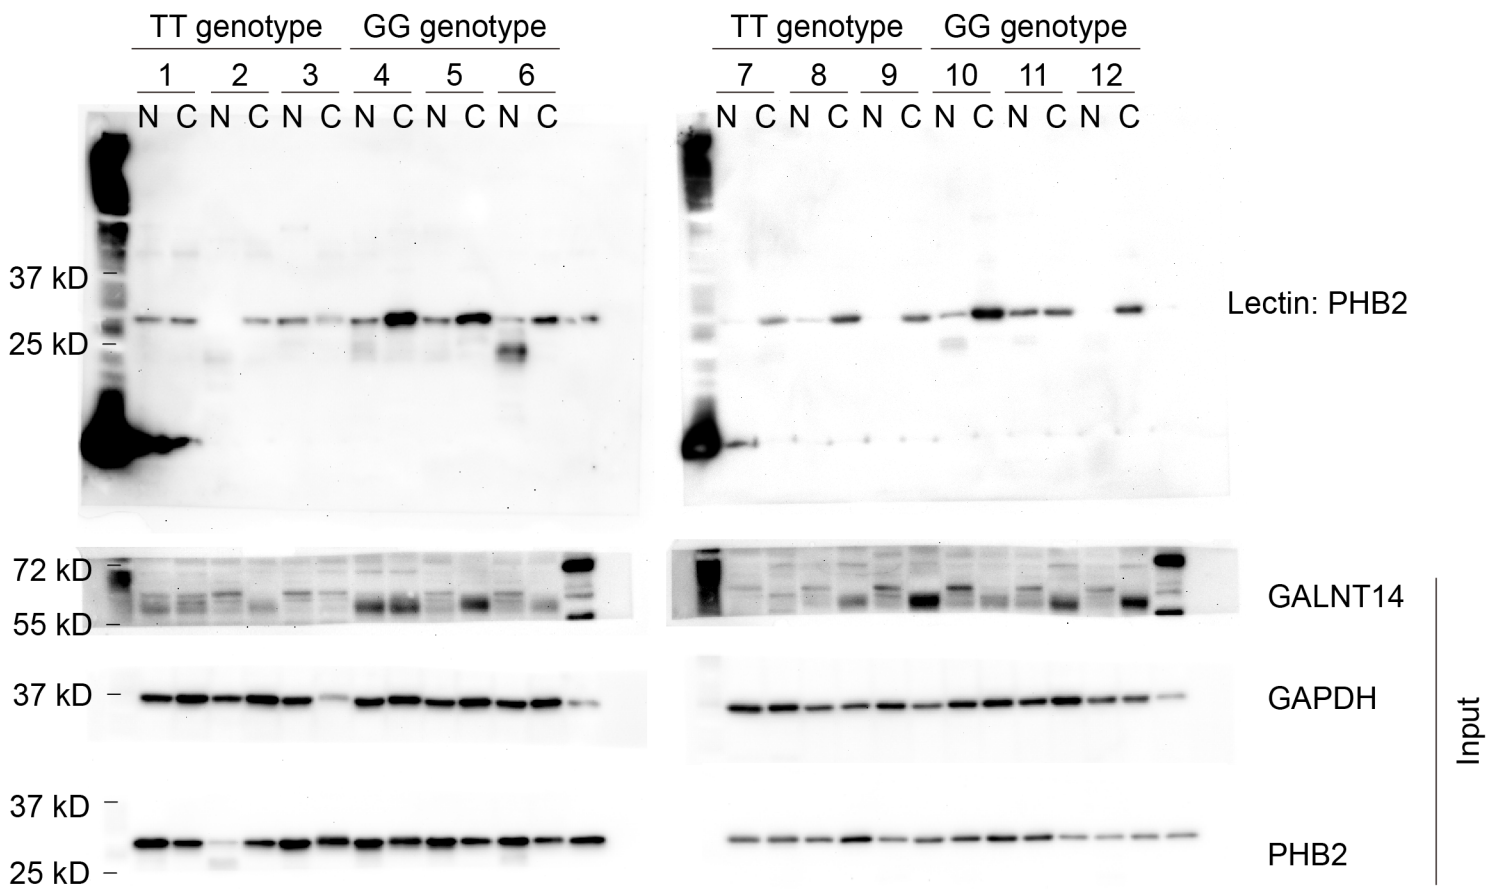

### Original western blots for Fig 7A

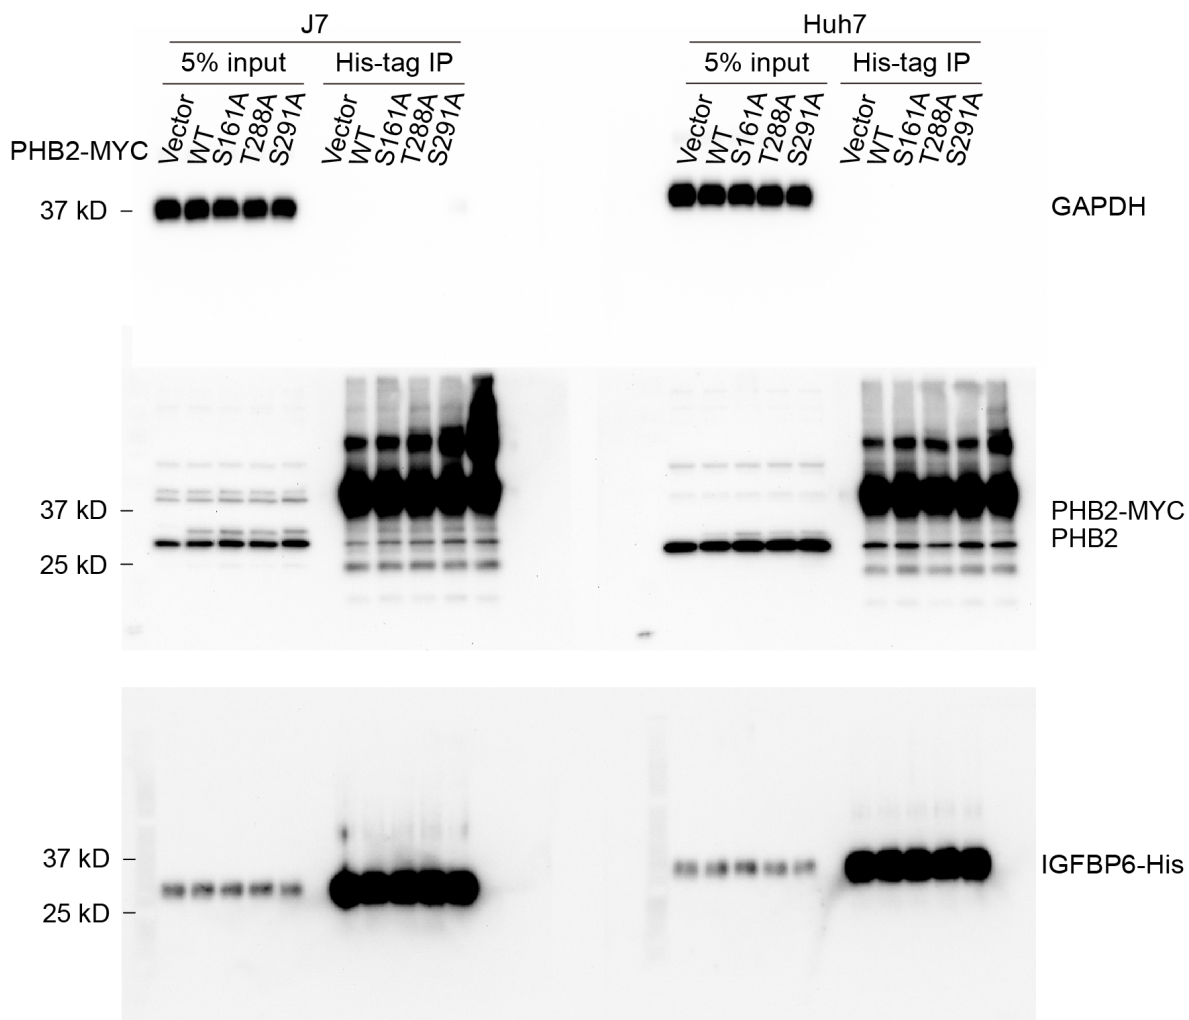

### Original western blots for Fig 7B

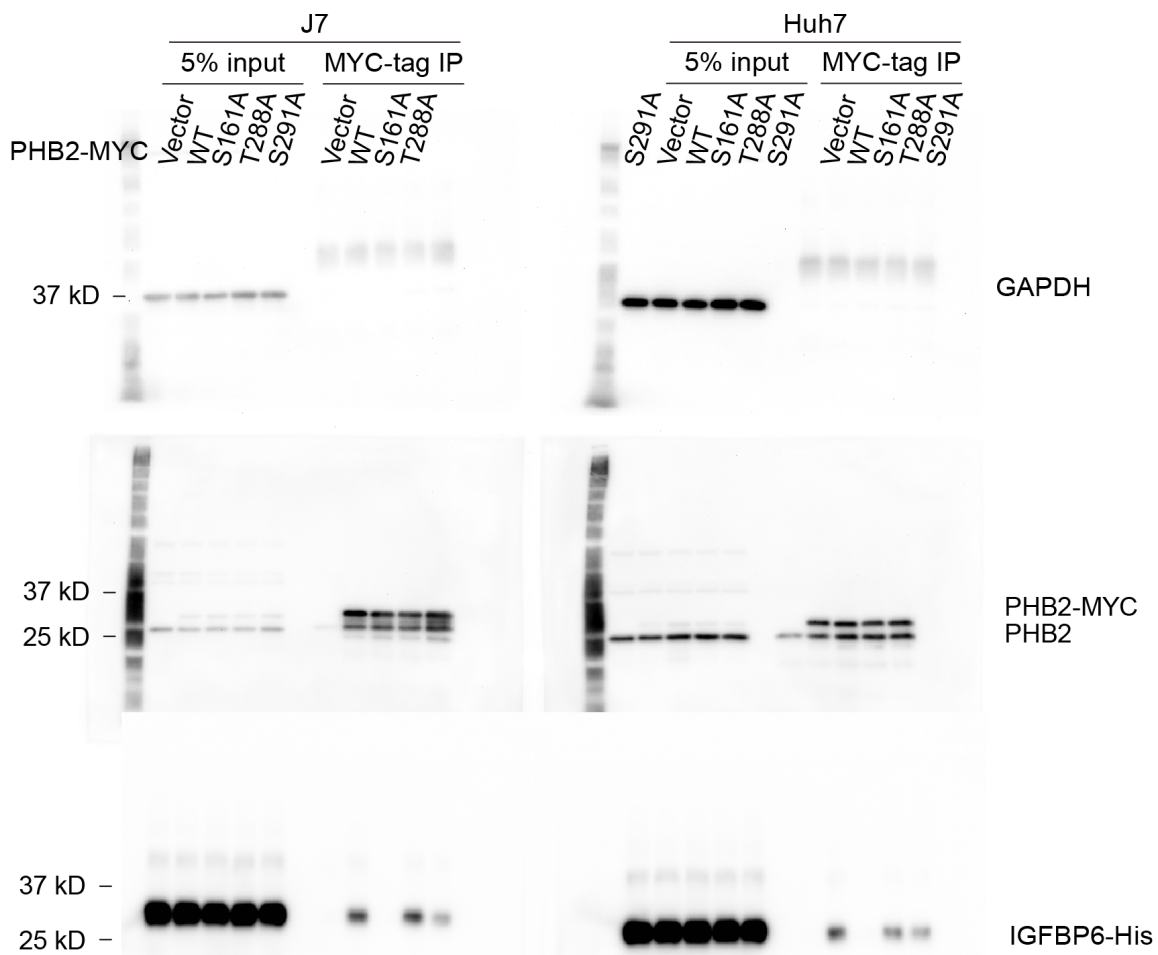

# Original western blots for Fig 7C

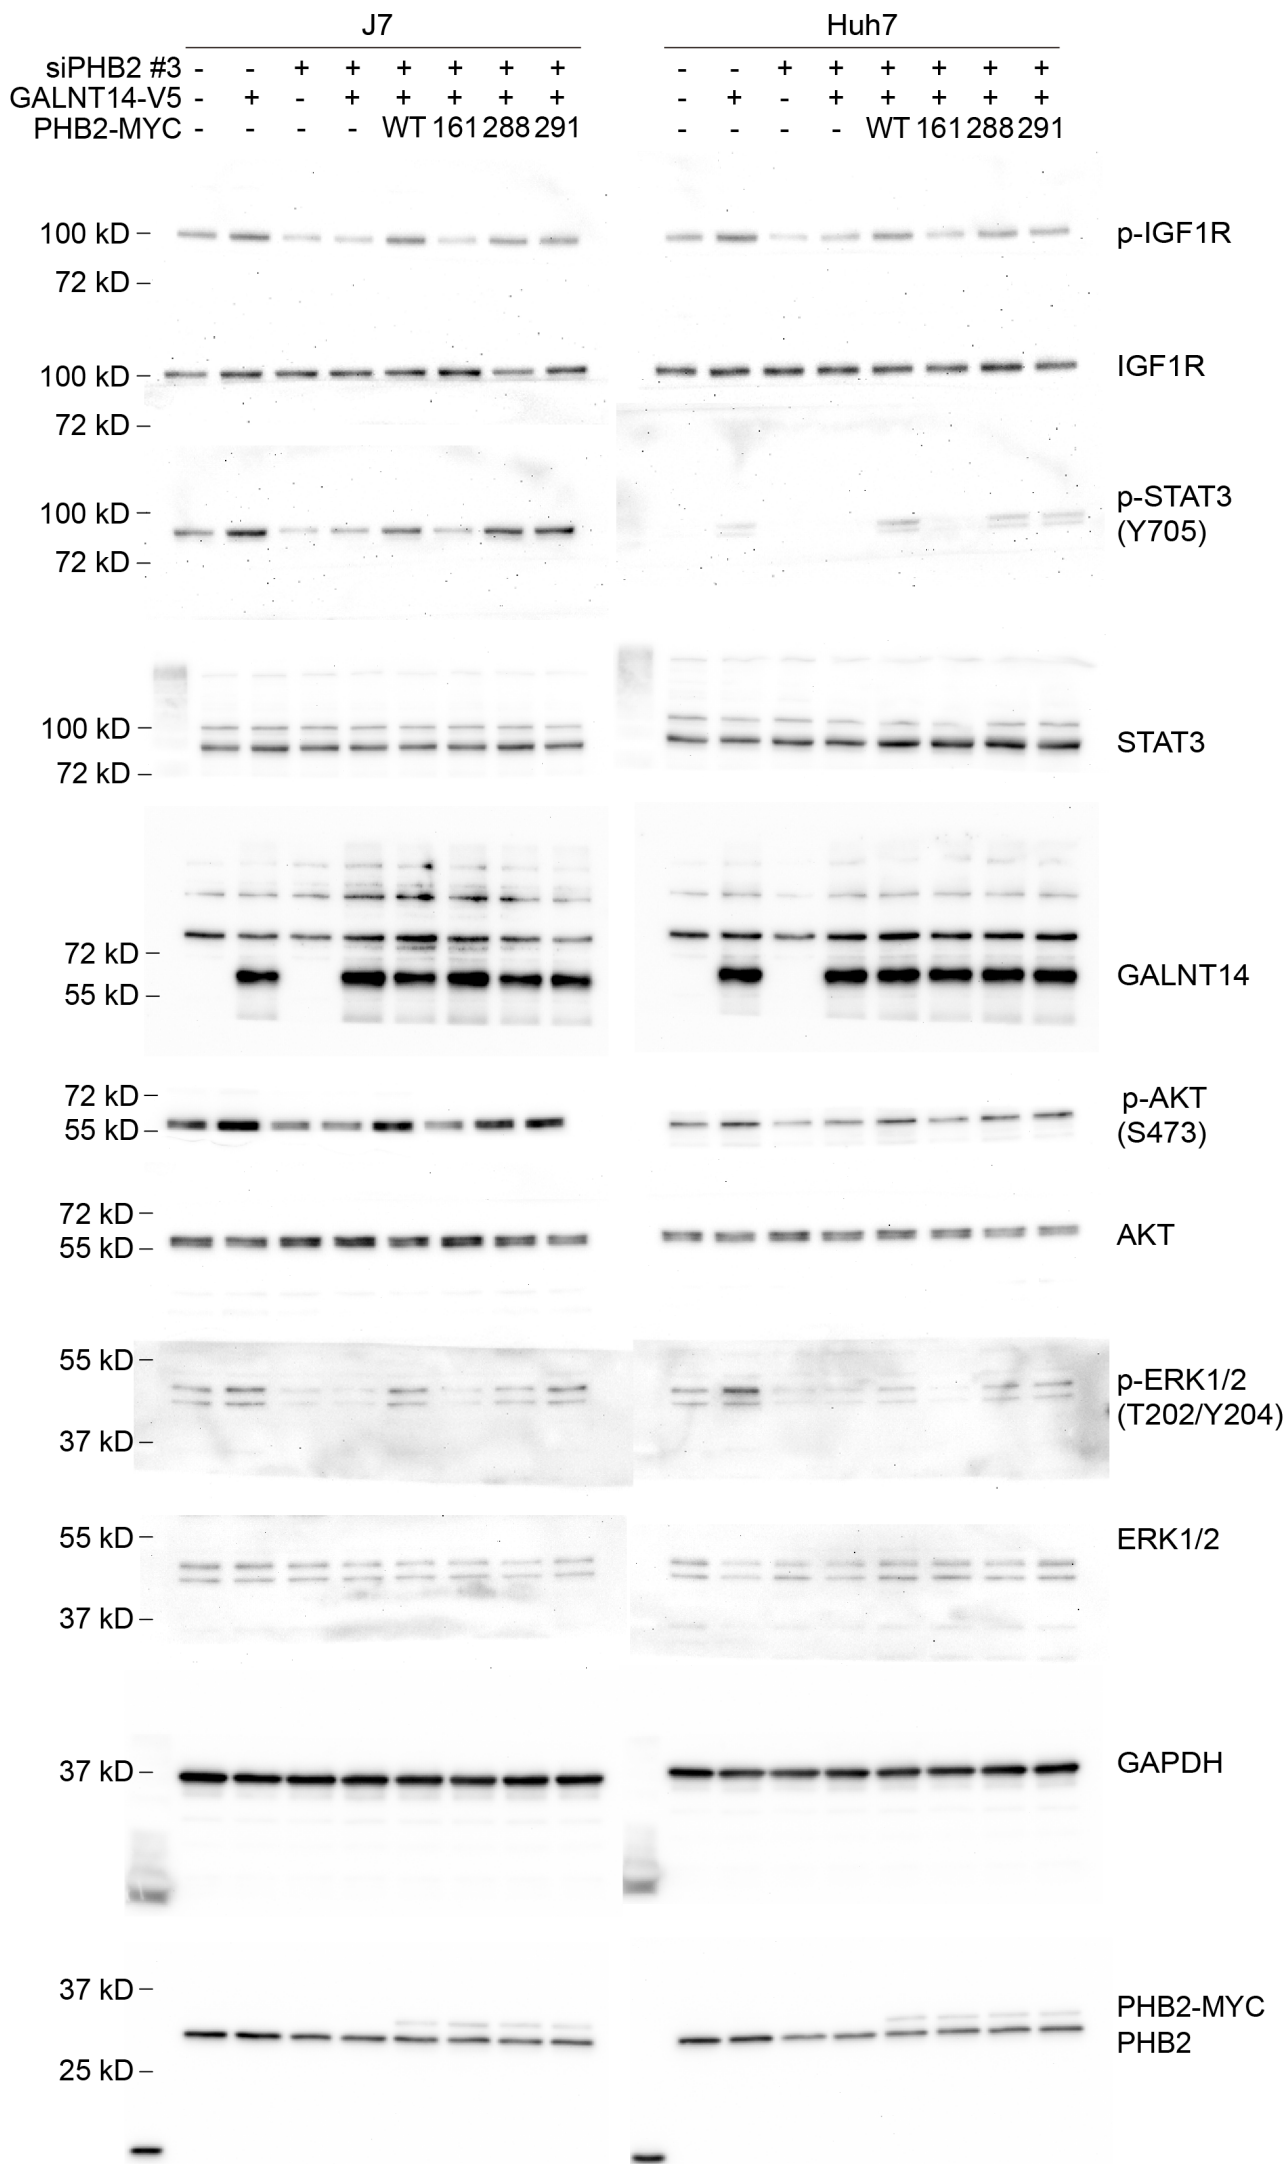

Supplement: 41419_2022_5419_MOESM3_ESM.pdf [file 41419_2022_5419_MOESM3_ESM.pdf]
